# Supplementary material
Source: Springer Nature journal article supplement (https://www.springermedizin.de/resource/supplementary/12958_2011_979_MOESM1_ESM.pdf/9566486)

**A – GPER cytoplasmic epithelium**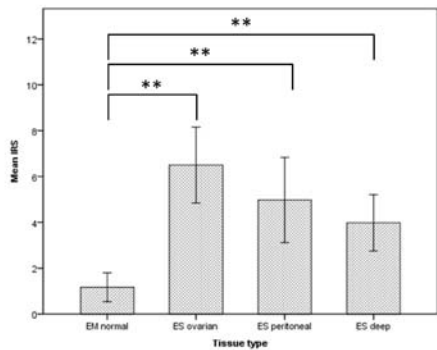**B – GPER nuclear epithelium**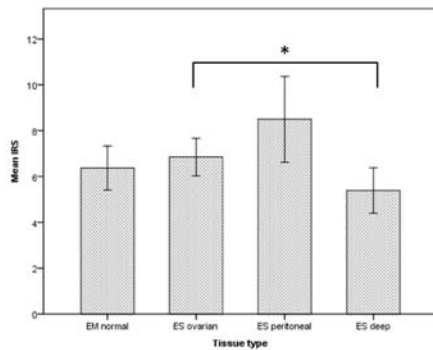**C – ER-alpha nuclear epithelium**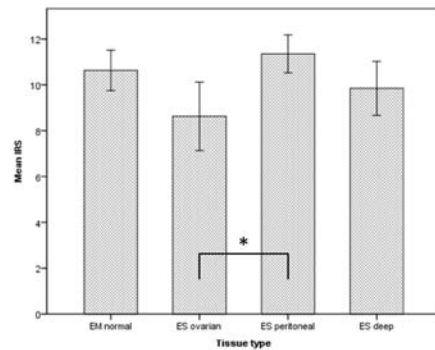**D – ER-beta nuclear epithelium**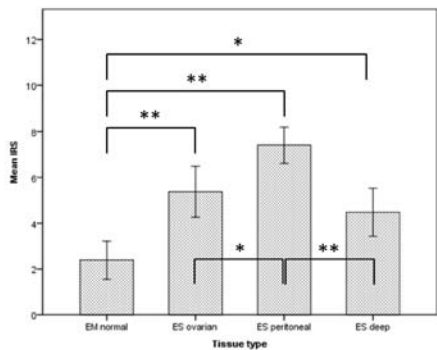**E – PR nuclear epithelium**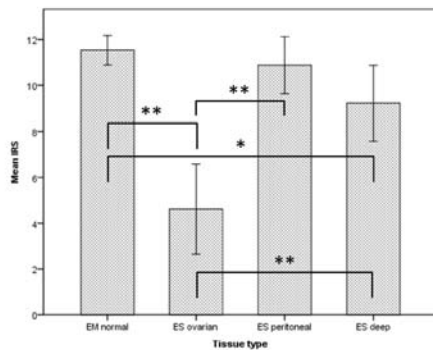**F – GPER nuclear stroma**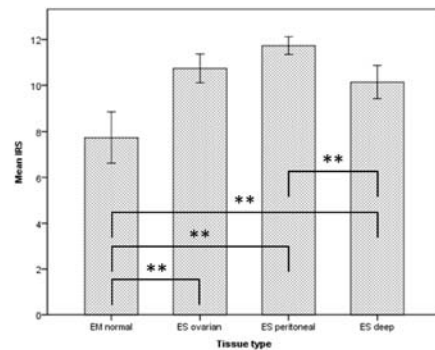**G – ER-alpha nuclear stroma**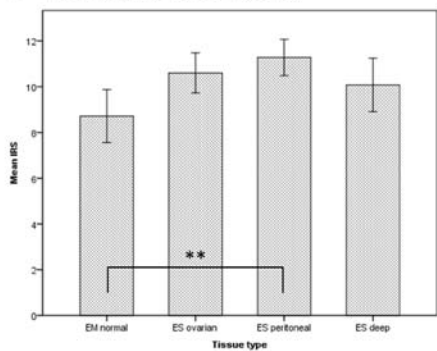**H – ER-beta nuclear stroma**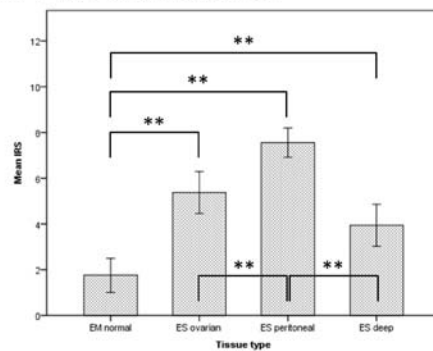**J – PR nuclear stroma**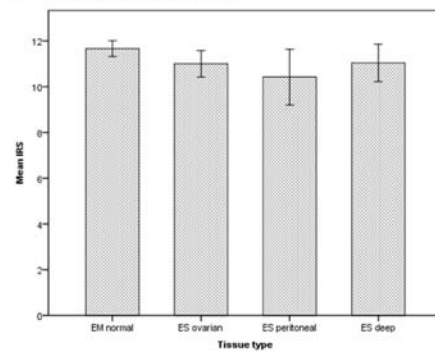

Supplement: MOESM1 [file 9566486]
